# Supplementary material for: Myocardial Infarction Suppresses Protein Synthesis and Causes Decoupling of Transcription and Translation
Source: PubMed Central journal article supplement — JACC Basic Transl Sci. 2024 May 15;9(6):792–807. doi: 10.1016/j.jacbts.2024.02.014 (PMC11282883; doi:10.1016/j.jacbts.2024.02.014), 2024-05-15
Supplement: mmc3.pdf [file mmc3.pdf]

**Supplemental Table 2. MI-Induced and Repressed Proteins**

| GeneSymbol | Sham_Mean   | MI_Mean     | Log2FC_MI_vs_Sh | MI_vs_Sh   |
|------------|-------------|-------------|-----------------|------------|
| "Rab8b"    | 0           | 3.233498029 | 10.74144795     | MI-induced |
| "Serpinf2" | 0           | 3.111731037 | 10.33694676     | MI-induced |
| "Krt19"    | 1.612177086 | 4.672675645 | 10.16675615     | MI-induced |
| "Myh4"     | 2.235222281 | 5.167615716 | 9.741200139     | MI-induced |
| "Zc3hav1"  | 0.780315506 | 3.656200264 | 9.553482375     | MI-induced |
| "Rragd"    | 0           | 2.331045629 | 7.743565965     | MI-induced |
| "Ndufa3"   | 1.091933933 | 3.342068021 | 7.474783643     | MI-induced |
| "Naa25"    | 0           | 2.210171756 | 7.342031651     | MI-induced |
| "Ldah"     | 0.511399591 | 2.687065448 | 7.227405536     | MI-induced |
| "Thbs1"    | 0.829334297 | 2.96847713  | 7.106078678     | MI-induced |
| "Fam184a"  | 0           | 2.137027777 | 7.099052613     | MI-induced |
| "Gpx1"     | 1.037836264 | 3.161944221 | 7.056133898     | MI-induced |
| "Plg"      | 1.392229154 | 3.46186742  | 6.875189503     | MI-induced |
| "Apoa4"    | 1.024380252 | 3.079745303 | 6.827774907     | MI-induced |
| "Msi2"     | 0.908186432 | 2.956656094 | 6.804868925     | MI-induced |
| "Ivns1abp" | 0.668395632 | 2.691495392 | 6.72059193      | MI-induced |
| "Glb1l3"   | 0.646885292 | 2.656276148 | 6.675051939     | MI-induced |
| "Traip"    | 0.919436604 | 2.923580952 | 6.657623415     | MI-induced |
| "Ppp1r12b" | 0           | 1.986511803 | 6.599049368     | MI-induced |
| "Rpl17"    | 0.748384167 | 2.711596763 | 6.521651079     | MI-induced |
| "Trdn"     | 0.574095214 | 2.535574223 | 6.515892227     | MI-induced |
| "Acyp2"    | 1.052845878 | 2.970503122 | 6.370319474     | MI-induced |
| "Ezr"      | 1.132084417 | 3.04661032  | 6.359917385     | MI-induced |
| "Golt1b"   | 0.92278479  | 2.809562178 | 6.267738815     | MI-induced |
| "Alpk3"    | 0           | 1.877605124 | 6.237269211     | MI-induced |
| "Rpl10"    | 0.818607169 | 2.674872619 | 6.166380352     | MI-induced |
| "Dusp27"   | 0.902036429 | 2.739879686 | 6.105183148     | MI-induced |
| "Gclm"     | 1.009326907 | 2.829487228 | 6.046441708     | MI-induced |
| "Tubb2a"   | 2.891284249 | 4.658967584 | 5.872116932     | MI-induced |
| "Vtn"      | 1.989023574 | 3.700454471 | 5.685250378     | MI-induced |
| "Mon2"     | 0           | 1.702557648 | 5.655774084     | MI-induced |
| "Cdc42"    | 1.110608591 | 2.801111465 | 5.615728991     | MI-induced |
| "Capg"     | 1.634413119 | 3.258660856 | 5.395634192     | MI-induced |
| "Numa1"    | 0.901191189 | 2.509902891 | 5.344024601     | MI-induced |
| "Slc2a1"   | 0.886161127 | 2.488677165 | 5.323443051     | MI-induced |
| "Pakap"    | 0.979743598 | 2.570572941 | 5.284620687     | MI-induced |
| "Sf3b1"    | 0.850545917 | 2.389789831 | 5.113257605     | MI-induced |
| "Erh"      | 0.936845975 | 2.47574677  | 5.112117786     | MI-induced |
| "Chrna10"  | 2.831383821 | 4.367833944 | 5.10397683      | MI-induced |

|                 |             |             |             |            |
|-----------------|-------------|-------------|-------------|------------|
| "Krt17"         | 3.084633829 | 4.618536011 | 5.095512752 | MI-induced |
| "Cacna2d1"      | 1.115094573 | 2.626439402 | 5.02057885  | MI-induced |
| "Cul5"          | 0           | 1.470316232 | 4.884284798 | MI-induced |
| "Ccdc88c"       | 0.791739149 | 2.252398366 | 4.852204891 | MI-induced |
| "Btbd1"         | 2.287129589 | 3.713299291 | 4.737633199 | MI-induced |
| "Gykl1"         | 0.978712174 | 2.373364931 | 4.632936174 | MI-induced |
| "Hspa1b"        | 2.747711117 | 4.138089317 | 4.618736407 | MI-induced |
| "Hspa1a"        | 2.747711117 | 4.138089317 | 4.618736407 | MI-induced |
| "Apob"          | 0.986726587 | 2.34220336  | 4.502796376 | MI-induced |
| "Tgm5"          | 1.656589307 | 2.973305894 | 4.374037823 | MI-induced |
| "Ckap5"         | 0.992024606 | 2.305162549 | 4.362149824 | MI-induced |
| "Tubb6"         | 2.391831548 | 3.675433165 | 4.264032275 | MI-induced |
| "S100a11"       | 1.144944759 | 2.388382556 | 4.130610953 | MI-induced |
| "Rab8a"         | 2.142556729 | 3.37961651  | 4.109423642 | MI-induced |
| "Tom1l2"        | 1.698376773 | 2.926538977 | 4.079866529 | MI-induced |
| "Lcp1"          | 1.889813846 | 3.07516169  | 3.937640303 | MI-induced |
| "Dhrs7c"        | 1.220608064 | 2.399089935 | 3.914832037 | MI-induced |
| "Hrg"           | 1.534920029 | 2.699729136 | 3.8694121   | MI-induced |
| "Itgb6"         | 1.944000636 | 3.100931534 | 3.843241253 | MI-induced |
| "Gda"           | 1.662152224 | 2.813038407 | 3.823161146 | MI-induced |
| "St3gal6"       | 1.889772343 | 3.0311781   | 3.791667851 | MI-induced |
| "Nsfl1c"        | 1.725374447 | 2.848550587 | 3.731110375 | MI-induced |
| "Hmcn1"         | 2.776342374 | 3.896254776 | 3.720268469 | MI-induced |
| "Rpl3"          | 2.289071501 | 3.408464605 | 3.718543403 | MI-induced |
| "Efhd2"         | 1.946738524 | 3.045406059 | 3.649694553 | MI-induced |
| "Timm23"        | 1.344048207 | 2.431690361 | 3.613069029 | MI-induced |
| "Snrpa"         | 1.802647862 | 2.887637915 | 3.604258942 | MI-induced |
| "Eif3f"         | 1.546698421 | 2.629648746 | 3.597483109 | MI-induced |
| "Acad10"        | 1.869952572 | 2.946153585 | 3.575062378 | MI-induced |
| "Ddx47"         | 1.901057229 | 2.975640315 | 3.569687745 | MI-induced |
| "Pgp"           | 1.432845781 | 2.497034135 | 3.535157192 | MI-induced |
| "Pdlim7"        | 1.571000656 | 2.632848523 | 3.52738226  | MI-induced |
| "Impa1"         | 1.617289725 | 2.671886003 | 3.503293005 | MI-induced |
| "4930519G04Rik" | 1.54591216  | 2.56424661  | 3.382833821 | MI-induced |
| "Gpr156"        | 2.147614091 | 3.16117898  | 3.366989681 | MI-induced |
| "Ddx17"         | 2.145126353 | 3.150686709 | 3.340399197 | MI-induced |
| "Etf1"          | 1.668271308 | 2.671856471 | 3.333837751 | MI-induced |
| "lpo7"          | 1.804715532 | 2.807355823 | 3.330698952 | MI-induced |
| "Itgax"         | 2.042235455 | 3.036936004 | 3.304323698 | MI-induced |
| "Etnk1"         | 1.693992628 | 2.681992223 | 3.282063612 | MI-induced |
| "Ap1g1"         | 1.733763877 | 2.714890722 | 3.259232833 | MI-induced |
| "Rab5a"         | 2.160675637 | 3.130047137 | 3.22018242  | MI-induced |

|            |             |             |             |            |
|------------|-------------|-------------|-------------|------------|
| "Psmb3"    | 1.880872474 | 2.845759843 | 3.205286462 | MI-induced |
| "Rps12"    | 1.652356012 | 2.606923898 | 3.171005877 | MI-induced |
| "Asrgl1"   | 1.487198037 | 2.436754666 | 3.154358843 | MI-induced |
| "Serpib1a" | 2.785671289 | 3.730506698 | 3.138675289 | MI-induced |
| "Tagln2"   | 1.915366722 | 2.85366916  | 3.11697323  | MI-induced |
| "Rock1"    | 1.241740019 | 2.170889291 | 3.086567073 | MI-induced |
| "Rpl18a"   | 2.038729751 | 2.931244579 | 2.964870082 | MI-induced |
| "mt-Co3"   | 2.637691108 | 3.524065946 | 2.944473478 | MI-induced |
| "Prkar2a"  | 1.672326306 | 2.555211301 | 2.932880469 | MI-induced |
| "Slc27a4"  | 1.204588929 | 2.081751058 | 2.91386952  | MI-induced |
| "U2af2"    | 1.760682078 | 2.628291348 | 2.882135607 | MI-induced |
| "Atad1"    | 2.046160594 | 2.91091387  | 2.872648203 | MI-induced |
| "Tmx4"     | 1.685647426 | 2.547210714 | 2.862051291 | MI-induced |
| "Gspt1"    | 1.673758981 | 2.535035871 | 2.861099898 | MI-induced |
| "Myo15"    | 1.788972466 | 2.647804467 | 2.852978153 | MI-induced |
| "Lama4"    | 0.72935687  | 1.579574256 | 2.82436102  | MI-induced |
| "Eif3b"    | 1.704025551 | 2.552384808 | 2.81818845  | MI-induced |
| "Hdlbp"    | 2.465190103 | 3.31190301  | 2.812719395 | MI-induced |
| "Hist1h1a" | 2.391240886 | 3.231595831 | 2.7915987   | MI-induced |
| "Sec24c"   | 1.506865533 | 2.345397577 | 2.785543154 | MI-induced |
| "Eif4g2"   | 1.657146488 | 2.493621689 | 2.778710471 | MI-induced |
| "Cox7a2"   | 2.120045185 | 2.948229879 | 2.751170004 | MI-induced |
| "Copb2"    | 1.504716196 | 2.32352412  | 2.720021047 | MI-induced |
| "Fscn1"    | 1.878810044 | 2.696202552 | 2.715319135 | MI-induced |
| "Matr3"    | 1.570127819 | 2.367575347 | 2.649063348 | MI-induced |
| "Rabggt"   | 0.687693627 | 1.478612601 | 2.627375963 | MI-induced |
| "Sec23a"   | 1.830529293 | 2.610152046 | 2.589850728 | MI-induced |
| "Rhot2"    | 1.471282553 | 2.24597888  | 2.573485493 | MI-induced |
| "Myh11"    | 2.301677892 | 3.072206994 | 2.55964227  | MI-induced |
| "Ank1"     | 2.35539304  | 3.09318908  | 2.450905393 | MI-induced |
| "Atic"     | 2.009424851 | 2.744759265 | 2.442728049 | MI-induced |
| "Ppp2r5a"  | 1.766983754 | 2.487002551 | 2.39185067  | MI-induced |
| "Ccdc138"  | 2.147678654 | 2.842763961 | 2.309023409 | MI-induced |
| "Esr1"     | 2.092385531 | 2.772195453 | 2.258279678 | MI-induced |
| "Tm7sf3"   | 1.683830221 | 2.3467687   | 2.202233956 | MI-induced |
| "Hsd17b11" | 1.984883876 | 2.642648628 | 2.185047211 | MI-induced |
| "Osbp18"   | 1.685701859 | 2.340267448 | 2.174419822 | MI-induced |
| "Gk"       | 1.671440808 | 2.316625898 | 2.143258477 | MI-induced |
| "Rad23b"   | 1.824523668 | 2.455654826 | 2.096572325 | MI-induced |
| "Mlycd"    | 2.15288468  | 2.75822826  | 2.010907847 | MI-induced |
| "Uggt1"    | 1.483218705 | 2.075256851 | 1.966708149 | MI-induced |
| "Sacm1l"   | 1.659776908 | 2.240290793 | 1.928425386 | MI-induced |

|            |             |             |              |              |
|------------|-------------|-------------|--------------|--------------|
| "Mypn"     | 1.225907365 | 1.806339059 | 1.928152351  | MI-induced   |
| "Rbbp4"    | 1.434397785 | 2.0112392   | 1.916225702  | MI-induced   |
| "Rbbp7"    | 1.426936216 | 2.000093254 | 1.903986466  | MI-induced   |
| "Rtcb"     | 1.661239255 | 2.227736873 | 1.881864352  | MI-induced   |
| "Mylk"     | 1.64197513  | 2.176243113 | 1.774799821  | MI-induced   |
| "Mapk8"    | 1.474583918 | 2.005122573 | 1.762411263  | MI-induced   |
| "Mapk14"   | 1.470796453 | 2.001232676 | 1.76207099   | MI-induced   |
| "Mapk11"   | 1.459642739 | 1.989771969 | 1.761051183  | MI-induced   |
| "Mapk12"   | 1.442415179 | 1.97205417  | 1.759422647  | MI-induced   |
| "Mapk13"   | 1.417884764 | 1.94679058  | 1.75698709   | MI-induced   |
| "Mapk9"    | 1.408091307 | 1.936692402 | 1.755974829  | MI-induced   |
| "Mapk10"   | 1.381719021 | 1.909463777 | 1.753130134  | MI-induced   |
| "Rrbp1"    | 1.532163554 | 2.049388035 | 1.718182536  | MI-induced   |
| "Dnajc13"  | 0.95969371  | 1.45292222  | 1.638469645  | MI-induced   |
| "Fbxl7"    | 2.351582396 | 2.830842339 | 1.59206707   | MI-induced   |
| "Bcs1l"    | 1.99392802  | 2.444929947 | 1.498195971  | MI-induced   |
| "Apoa1"    | 4.048981573 | 4.465291761 | 1.38295251   | MI-induced   |
| "Emc1"     | 1.540919969 | 1.883722538 | 1.138765485  | MI-induced   |
| "Rpsa"     | 3.853113327 | 4.168710654 | 1.04839163   | MI-induced   |
| "Apeh"     | 2.830613148 | 3.142642414 | 1.036538785  | MI-induced   |
| "Ap2m1"    | 2.154818579 | 2.462262821 | 1.021307664  | MI-induced   |
| "Gm1043"   | 2.961194614 | 3.245901675 | 0.945776385  | MI-induced   |
| "Pgam1"    | 3.684660691 | 3.926672027 | 0.803944255  | MI-induced   |
| "Hist1h1d" | 3.64601023  | 3.886773524 | 0.799798348  | MI-induced   |
| "Ivd"      | 4.224432931 | 4.442730549 | 0.725168991  | MI-induced   |
| "Tasor"    | 2.63104541  | 2.827061151 | 0.651150197  | MI-induced   |
| "Alb"      | 5.749158981 | 5.90854868  | 0.529481117  | MI-induced   |
| "Pgk2"     | 2.505309292 | 2.644448217 | 0.462209503  | MI-induced   |
| "Cox7c"    | 4.075657738 | 4.144225747 | 0.227777994  | MI-induced   |
| "Cul4a"    | 1.41709029  | 1.396575201 | -0.068149648 | MI-repressed |
| "Ugt2b38"  | 1.282280769 | 1.259039316 | -0.077206437 | MI-repressed |
| "Lamb1"    | 3.31800515  | 3.284812972 | -0.110262027 | MI-repressed |
| "Uqcrb"    | 4.250097482 | 4.21536965  | -0.115363361 | MI-repressed |
| "Pdhb"     | 5.129853956 | 5.09477378  | -0.116533821 | MI-repressed |
| "Hadha"    | 5.591299902 | 5.546723672 | -0.148079033 | MI-repressed |
| "Ak2"      | 3.753250748 | 3.707597256 | -0.15165762  | MI-repressed |
| "Mff"      | 1.932238068 | 1.87562142  | -0.188076434 | MI-repressed |
| "Fahd1"    | 3.474623831 | 3.417348894 | -0.190263225 | MI-repressed |
| "Capza2"   | 3.844059443 | 3.78550936  | -0.194499166 | MI-repressed |
| "Sod2"     | 4.420073512 | 4.357912176 | -0.206495488 | MI-repressed |
| "Vdac1"    | 5.270311678 | 5.203128851 | -0.223176523 | MI-repressed |
| "Dlst"     | 4.979140967 | 4.905934906 | -0.243185269 | MI-repressed |

|            |             |             |              |              |
|------------|-------------|-------------|--------------|--------------|
| "Ndufa10"  | 4.624389624 | 4.549031348 | -0.250334775 | MI-repressed |
| "Etfb"     | 5.407955482 | 5.330170623 | -0.258395709 | MI-repressed |
| "Etfb"     | 5.244543043 | 5.16233349  | -0.273094226 | MI-repressed |
| "Hmgb1"    | 2.310416868 | 2.227661044 | -0.274908895 | MI-repressed |
| "Anxa4"    | 2.274872807 | 2.189468926 | -0.283705553 | MI-repressed |
| "Ndufv2"   | 4.374521677 | 4.288233237 | -0.286643994 | MI-repressed |
| "C1qbp"    | 4.112498685 | 4.020695656 | -0.30496306  | MI-repressed |
| "Got2"     | 5.598817115 | 5.499744335 | -0.329112651 | MI-repressed |
| "Acsl1"    | 5.099634341 | 4.997262515 | -0.340071845 | MI-repressed |
| "Ndufs3"   | 4.830667536 | 4.727055261 | -0.344192528 | MI-repressed |
| "Vdac3"    | 5.20888642  | 5.101753586 | -0.355887571 | MI-repressed |
| "Pccb"     | 4.07288566  | 3.963432591 | -0.363595227 | MI-repressed |
| "Acaa2"    | 5.444736561 | 5.32902584  | -0.384382695 | MI-repressed |
| "Crip2"    | 4.982205137 | 4.86385191  | -0.39316091  | MI-repressed |
| "Aldh6a1"  | 4.510805039 | 4.38988049  | -0.401702655 | MI-repressed |
| "Cpt2"     | 4.563323074 | 4.435209149 | -0.425585248 | MI-repressed |
| "Acot2"    | 4.426734601 | 4.297010675 | -0.430933556 | MI-repressed |
| "Nedd4l"   | 3.528908956 | 3.385460531 | -0.476525353 | MI-repressed |
| "Eif4a3"   | 2.074246714 | 1.928549275 | -0.483996414 | MI-repressed |
| "Adh5"     | 3.590884461 | 3.428216575 | -0.540371017 | MI-repressed |
| "Clasp1"   | 1.577390606 | 1.413577015 | -0.544176969 | MI-repressed |
| "Ddost"    | 3.166644492 | 2.996434211 | -0.565426314 | MI-repressed |
| "H2-Ke6"   | 3.677655771 | 3.499611173 | -0.591451351 | MI-repressed |
| "Uqcr11"   | 4.347087558 | 4.153127309 | -0.644322    | MI-repressed |
| "Acss1"    | 4.485964937 | 4.290991255 | -0.64768855  | MI-repressed |
| "Fanci"    | 3.198157169 | 2.996324587 | -0.670473324 | MI-repressed |
| "Calr"     | 2.524126798 | 2.29388738  | -0.764838792 | MI-repressed |
| "Eif3h"    | 1.591602144 | 1.348845985 | -0.806418504 | MI-repressed |
| "Rmdn1"    | 3.72172378  | 3.468887841 | -0.83990281  | MI-repressed |
| "Acad8"    | 3.307942278 | 3.049276258 | -0.85926992  | MI-repressed |
| "Selenbp1" | 4.315227167 | 4.055933    | -0.861356579 | MI-repressed |
| "Arhgap20" | 2.250669843 | 1.991103867 | -0.86225951  | MI-repressed |
| "Rack1"    | 3.365774598 | 3.103034186 | -0.872804756 | MI-repressed |
| "Prrc2b"   | 2.305317604 | 2.032248853 | -0.907114755 | MI-repressed |
| "Bckdha"   | 3.606879644 | 3.329516422 | -0.921380682 | MI-repressed |
| "Tomm22"   | 2.265396468 | 1.986029784 | -0.928036038 | MI-repressed |
| "Lap3"     | 3.296790205 | 3.000562311 | -0.984047765 | MI-repressed |
| "Huwe1"    | 1.91589285  | 1.608934003 | -1.019695215 | MI-repressed |
| "Psmc12"   | 2.279269688 | 1.962264402 | -1.053068769 | MI-repressed |
| "Vps13c"   | 1.481340632 | 1.161209752 | -1.063451765 | MI-repressed |
| "Tln2"     | 2.732613235 | 2.411709588 | -1.066018841 | MI-repressed |
| "Gfm2"     | 2.829550422 | 2.482853913 | -1.151700872 | MI-repressed |

|            |             |             |              |              |
|------------|-------------|-------------|--------------|--------------|
| "Capn1"    | 2.247842804 | 1.88584522  | -1.202529942 | MI-repressed |
| "Esyt1"    | 2.039994003 | 1.667580354 | -1.237131361 | MI-repressed |
| "Eci2"     | 3.785078078 | 3.399490302 | -1.280894863 | MI-repressed |
| "Atp2b1"   | 2.245400114 | 1.849018519 | -1.316751156 | MI-repressed |
| "Npm1"     | 2.512510459 | 2.096252976 | -1.382777428 | MI-repressed |
| "Atp6v1e1" | 2.464790788 | 2.046520572 | -1.389463583 | MI-repressed |
| "Ctnna3"   | 1.956739699 | 1.528671081 | -1.422013169 | MI-repressed |
| "Copg1"    | 2.429083551 | 1.985693261 | -1.472910661 | MI-repressed |
| "Ctsb"     | 2.11812329  | 1.651224585 | -1.551003927 | MI-repressed |
| "Palld"    | 2.630054971 | 2.148988994 | -1.598066583 | MI-repressed |
| "Rps20"    | 3.071583202 | 2.588305593 | -1.605413469 | MI-repressed |
| "Kpna3"    | 2.402857299 | 1.912255112 | -1.629745189 | MI-repressed |
| "Mtap"     | 2.174695851 | 1.675866658 | -1.657074708 | MI-repressed |
| "Nomo1"    | 2.034331988 | 1.508280292 | -1.747505906 | MI-repressed |
| "Napa"     | 2.390197523 | 1.862749194 | -1.752145423 | MI-repressed |
| "Tspo"     | 2.043818177 | 1.51079109  | -1.770677655 | MI-repressed |
| "Rtca"     | 2.204009985 | 1.663480311 | -1.79560071  | MI-repressed |
| "Rab5c"    | 2.585929203 | 2.044713038 | -1.797881182 | MI-repressed |
| "Flot1"    | 2.684443907 | 2.12969467  | -1.842837077 | MI-repressed |
| "Sypl"     | 2.588906575 | 2.028681226 | -1.861028326 | MI-repressed |
| "Rpn1"     | 2.583654828 | 2.014462343 | -1.890816509 | MI-repressed |
| "Psm2"     | 2.69555765  | 2.125280314 | -1.894420304 | MI-repressed |
| "Cspg4"    | 1.948192042 | 1.369532135 | -1.922266604 | MI-repressed |
| "Ank3"     | 2.175737473 | 1.591883673 | -1.939520343 | MI-repressed |
| "Vars"     | 2.364231837 | 1.776866308 | -1.951186051 | MI-repressed |
| "Hagh"     | 2.304318689 | 1.708574423 | -1.979019615 | MI-repressed |
| "Lrrc59"   | 2.812924428 | 2.214695948 | -1.987271997 | MI-repressed |
| "Camk1"    | 2.521334599 | 1.92288949  | -1.987991623 | MI-repressed |
| "Ap2b1"    | 2.643553177 | 2.041384018 | -2.000362648 | MI-repressed |
| "Ogt"      | 2.124824037 | 1.519464252 | -2.010961677 | MI-repressed |
| "Ilk"      | 2.664686088 | 2.057205225 | -2.018007745 | MI-repressed |
| "Hnrnpa1"  | 2.995391595 | 2.378403764 | -2.049589212 | MI-repressed |
| "Tnpo2"    | 2.118005282 | 1.479442993 | -2.121258007 | MI-repressed |
| "Hspb8"    | 3.029346865 | 2.376551602 | -2.168538924 | MI-repressed |
| "Perm1"    | 2.05536296  | 1.398758037 | -2.181194341 | MI-repressed |
| "Mlec"     | 2.328850297 | 1.656723923 | -2.232755486 | MI-repressed |
| "Acdb7"    | 5.277201754 | 4.602161886 | -2.242433905 | MI-repressed |
| "Sept2"    | 2.855223569 | 2.174065995 | -2.262756482 | MI-repressed |
| "Pdia4"    | 2.296096968 | 1.58433675  | -2.364416264 | MI-repressed |
| "Syncrip"  | 2.814203345 | 2.100332633 | -2.371427172 | MI-repressed |
| "Psm2"     | 2.087910566 | 1.366737328 | -2.39568564  | MI-repressed |
| "Rps23"    | 3.227585802 | 2.497671606 | -2.424722476 | MI-repressed |

|           |             |             |              |              |
|-----------|-------------|-------------|--------------|--------------|
| "Psme2b"  | 2.117542397 | 1.386510044 | -2.428436911 | MI-repressed |
| "Cyb5r1"  | 2.398504427 | 1.665048188 | -2.436488886 | MI-repressed |
| "Tinagl1" | 1.287402489 | 0.546626423 | -2.460804825 | MI-repressed |
| "Tmed4"   | 2.502528367 | 1.757761769 | -2.474061086 | MI-repressed |
| "Rps11"   | 2.97815524  | 2.223825469 | -2.505829261 | MI-repressed |
| "Mgl1"    | 2.679868554 | 1.921386483 | -2.519622902 | MI-repressed |
| "Ptpn11"  | 2.366855868 | 1.604515353 | -2.532440377 | MI-repressed |
| "Ap2a1"   | 2.464527665 | 1.701733931 | -2.533945935 | MI-repressed |
| "Serbp1"  | 2.603008403 | 1.837179561 | -2.544028346 | MI-repressed |
| "Mlf2"    | 2.714327182 | 1.945901263 | -2.552655649 | MI-repressed |
| "Atpaf1"  | 2.56054571  | 1.791201717 | -2.555705424 | MI-repressed |
| "Dbx1"    | 2.421142123 | 1.642890356 | -2.585296408 | MI-repressed |
| "Arl6ip5" | 3.217682939 | 2.43230337  | -2.608974457 | MI-repressed |
| "Rps24"   | 2.992476684 | 2.205043139 | -2.615797617 | MI-repressed |
| "Ap2s1"   | 2.532517813 | 1.733735851 | -2.653496241 | MI-repressed |
| "Plaa"    | 2.406371754 | 1.606273967 | -2.657867318 | MI-repressed |
| "Ubp2l1"  | 2.037481299 | 1.23266922  | -2.673527856 | MI-repressed |
| "Psmg1"   | 2.305187572 | 1.490968023 | -2.704778795 | MI-repressed |
| "Pdzph1"  | 3.193368784 | 2.370356671 | -2.733987062 | MI-repressed |
| "Ssh2"    | 2.725403877 | 1.899514731 | -2.743544356 | MI-repressed |
| "Cab39"   | 2.46867141  | 1.620460266 | -2.817696431 | MI-repressed |
| "Pcmt1"   | 2.853340438 | 2.004304437 | -2.820436544 | MI-repressed |
| "Taldo1"  | 3.166267502 | 2.316803933 | -2.821856896 | MI-repressed |
| "Fermt2"  | 3.129949849 | 2.277558322 | -2.831583362 | MI-repressed |
| "Iqca"    | 2.779830542 | 1.920124164 | -2.855882771 | MI-repressed |
| "Zfp641"  | 2.282040716 | 1.416457486 | -2.875405252 | MI-repressed |
| "Chmp2b"  | 2.389001843 | 1.520411952 | -2.885393163 | MI-repressed |
| "Katnal2" | 3.260931553 | 2.386027015 | -2.906369967 | MI-repressed |
| "Vapa"    | 3.085614789 | 2.204709964 | -2.926302489 | MI-repressed |
| "Rragb"   | 2.599809948 | 1.709976682 | -2.955962126 | MI-repressed |
| "Gna13"   | 3.487200164 | 2.595812103 | -2.961127042 | MI-repressed |
| "Gja1"    | 3.006341408 | 2.104542464 | -2.995711248 | MI-repressed |
| "Rraga"   | 2.650382248 | 1.743684588 | -3.011984429 | MI-repressed |
| "A2ml1"   | 2.591686313 | 1.679128269 | -3.031452206 | MI-repressed |
| "Dars"    | 2.951694792 | 2.035878689 | -3.042275245 | MI-repressed |
| "Prex1"   | 1.901105245 | 0.968480391 | -3.098112704 | MI-repressed |
| "Rps18"   | 3.071300147 | 2.132438143 | -3.118832068 | MI-repressed |
| "Lmnb1"   | 2.84279131  | 1.902975795 | -3.121999562 | MI-repressed |
| "Slc27a1" | 2.440822569 | 1.499254064 | -3.127822869 | MI-repressed |
| "Rpl29"   | 3.268436533 | 2.326376031 | -3.12945725  | MI-repressed |
| "Clasp2"  | 1.64922879  | 0.706204172 | -3.132659972 | MI-repressed |
| "Dnpep"   | 2.82327953  | 1.879252585 | -3.135989631 | MI-repressed |

|           |             |             |              |              |
|-----------|-------------|-------------|--------------|--------------|
| "Mthfsd"  | 2.530952199 | 1.586133046 | -3.13862129  | MI-repressed |
| "Dag1"    | 2.354365138 | 1.408257322 | -3.142902136 | MI-repressed |
| "Fbxo40"  | 2.100455738 | 1.146872115 | -3.167736229 | MI-repressed |
| "Cdk16"   | 1.373676256 | 0.3977281   | -3.2420296   | MI-repressed |
| "Ppp5c"   | 2.818955746 | 1.835170264 | -3.268064633 | MI-repressed |
| "Capn2"   | 2.694740855 | 1.707161251 | -3.28066843  | MI-repressed |
| "Txnrd1"  | 2.689962781 | 1.692057037 | -3.314971127 | MI-repressed |
| "Sfpq"    | 2.934327852 | 1.932753641 | -3.327157511 | MI-repressed |
| "Ap2a2"   | 2.762775205 | 1.758302256 | -3.336786909 | MI-repressed |
| "Snx2"    | 2.909061758 | 1.895178958 | -3.368045759 | MI-repressed |
| "Psmc11"  | 3.123273922 | 2.101417006 | -3.394535198 | MI-repressed |
| "Mapre1"  | 2.954067991 | 1.90530293  | -3.483922121 | MI-repressed |
| "Wbp2"    | 3.357997908 | 2.304462429 | -3.499769107 | MI-repressed |
| "Eml2"    | 2.842358918 | 1.785753409 | -3.509967527 | MI-repressed |
| "Echdc3"  | 2.954093133 | 1.883313588 | -3.557052654 | MI-repressed |
| "Acad11"  | 2.753528708 | 1.677543975 | -3.574343917 | MI-repressed |
| "Ccdc141" | 2.547468719 | 1.463648797 | -3.600371848 | MI-repressed |
| "Camk2d"  | 3.238148282 | 2.149527026 | -3.616321533 | MI-repressed |
| "Ctnna2"  | 2.921280038 | 1.820247339 | -3.657551454 | MI-repressed |
| "Pdlim1"  | 2.942016697 | 1.840217686 | -3.660097089 | MI-repressed |
| "Krt14"   | 4.253202419 | 3.146943824 | -3.674911505 | MI-repressed |
| "Rpl26"   | 3.348499634 | 2.20702603  | -3.791893234 | MI-repressed |
| "Suox"    | 1.884385394 | 0.728816248 | -3.838717611 | MI-repressed |
| "Oxnad1"  | 3.045142962 | 1.880284155 | -3.869577197 | MI-repressed |
| "Gbe1"    | 2.133737396 | 0.951071229 | -3.928731966 | MI-repressed |
| "Abcd3"   | 2.816496591 | 1.626172269 | -3.954171809 | MI-repressed |
| "Abcb10"  | 2.474050922 | 1.283359993 | -3.955389648 | MI-repressed |
| "Nfe2l2"  | 2.990706175 | 1.792401596 | -3.980681645 | MI-repressed |
| "Eif4h"   | 2.980315968 | 1.743639604 | -4.108149958 | MI-repressed |
| "Dglucy"  | 3.219806383 | 1.978315571 | -4.124143208 | MI-repressed |
| "Fam129a" | 3.650090096 | 2.36510037  | -4.268643473 | MI-repressed |
| "Trip10"  | 2.008089308 | 0.715785342 | -4.29294085  | MI-repressed |
| "Vapb"    | 3.640579114 | 2.34089632  | -4.317452788 | MI-repressed |
| "Hc"      | 3.120845109 | 1.819214869 | -4.323922064 | MI-repressed |
| "Filip1"  | 2.137210913 | 0.800717585 | -4.439734737 | MI-repressed |
| "Psmc4"   | 2.311062046 | 0.958949236 | -4.491621531 | MI-repressed |
| "Ppfia3"  | 2.637215179 | 1.27472893  | -4.526081348 | MI-repressed |
| "Fam162a" | 3.324777072 | 1.950095731 | -4.56659257  | MI-repressed |
| "Oplah"   | 2.310403943 | 0.928516163 | -4.59053184  | MI-repressed |
| "Ctbp1"   | 2.233238194 | 0.844888827 | -4.611996767 | MI-repressed |
| "Rad50"   | 1.990952353 | 0.589999902 | -4.653863307 | MI-repressed |
| "Marc2"   | 2.286063102 | 0.884173163 | -4.656977575 | MI-repressed |

|              |             |             |              |              |
|--------------|-------------|-------------|--------------|--------------|
| "Limch1"     | 2.377032905 | 0.97459015  | -4.658813988 | MI-repressed |
| "Hist2h2aa1" | 3.906290277 | 2.502437015 | -4.663499593 | MI-repressed |
| "Hist2h2ac"  | 3.906290277 | 2.502437015 | -4.663499593 | MI-repressed |
| "Hist2h2aa2" | 3.906290277 | 2.502437015 | -4.663499593 | MI-repressed |
| "Sirt5"      | 2.372920168 | 0.853727818 | -5.046647748 | MI-repressed |
| "Nt5c3"      | 2.188494979 | 0.633619017 | -5.165186141 | MI-repressed |
| "Emc2"       | 2.345768636 | 0.78109938  | -5.197718759 | MI-repressed |
| "Krt75"      | 3.933373329 | 2.362783039 | -5.21738801  | MI-repressed |
| "Atg2b"      | 1.605506156 | 0           | -5.333376005 | MI-repressed |
| "Tpm4"       | 3.814739167 | 2.197025475 | -5.373928562 | MI-repressed |
| "Uqcc1"      | 2.524338465 | 0.883384039 | -5.451132613 | MI-repressed |
| "Ube2s"      | 2.762434027 | 1.119366072 | -5.458153601 | MI-repressed |
| "Syngr2"     | 2.712036926 | 1.055473774 | -5.502983678 | MI-repressed |
| "Tmem160"    | 2.863383661 | 1.122144745 | -5.784270474 | MI-repressed |
| "Micos10"    | 2.783967204 | 1.003440168 | -5.914782787 | MI-repressed |
| "Bcl10"      | 2.82196326  | 1.03558013  | -5.93423631  | MI-repressed |
| "Scamp3"     | 2.547305388 | 0.712514343 | -6.095043919 | MI-repressed |
| "Rac2"       | 2.709899219 | 0.85874254  | -6.149409381 | MI-repressed |
| "Rac3"       | 2.709899219 | 0.85874254  | -6.149409381 | MI-repressed |
| "Hp1bp3"     | 2.856461946 | 0.984397542 | -6.218863339 | MI-repressed |
| "Olfr430"    | 2.912787043 | 1.020801968 | -6.285038377 | MI-repressed |
| "Abhd11"     | 2.658154892 | 0.760812342 | -6.302835523 | MI-repressed |
| "Cipc"       | 3.01301169  | 1.113671659 | -6.309471009 | MI-repressed |
| "Vps28"      | 2.900767875 | 0.962982348 | -6.437184184 | MI-repressed |
| "Ltf"        | 2.507271761 | 0.547151099 | -6.511379896 | MI-repressed |
| "Twf2"       | 2.880698931 | 0.896920073 | -6.589970722 | MI-repressed |
| "Arhgap31"   | 3.647903003 | 1.653955095 | -6.623751573 | MI-repressed |
| "Dach1"      | 2.021302518 | 0           | -6.714621623 | MI-repressed |
| "Dach2"      | 2.030354095 | 0           | -6.744690312 | MI-repressed |
| "Ctbp2"      | 2.090560044 | 0           | -6.944690143 | MI-repressed |
| "Tmem177"    | 2.772812606 | 0.654576639 | -7.036627572 | MI-repressed |
| "Dele1"      | 2.19219183  | 0           | -7.282303628 | MI-repressed |
| "Cox6a2"     | 3.228946434 | 0.988447599 | -7.442776028 | MI-repressed |
| "Mak"        | 3.443538496 | 1.0028532   | -8.107781055 | MI-repressed |
| "Hspa12b"    | 2.515209531 | 0           | -8.355345204 | MI-repressed |
| "Echdc2"     | 2.605651552 | 0           | -8.655787096 | MI-repressed |
| "Chpt1"      | 3.107068003 | 0           | -10.32145649 | MI-repressed |
| "Aldoart1"   | 4.333077532 | 0           | -14.39417199 | MI-repressed |

GeneSymbol = encoding gene names of detected proteins. Background\_Mean = normalized sample-mean protein expression level in the background samples. Sham\_Mean = normalized sample-mean protein expression level in the post-sham surgery samples. Log2FC\_MI\_vs\_Sh =

Log<sub>2</sub>-transformed fold change of protein expression levels comparing post-MI surgery samples with post-sham samples.
